# Supplementary material for: Preparation of a magnetic and recyclable superparamagnetic silica support with a boronic acid group for immobilizing Pd catalysts and its applications in Suzuki reactions
Source: PubMed Central journal article supplement — RSC Adv. 2021 Oct 15;11(53):33692–702. doi: 10.1039/d1ra04892a (PMC9042304; doi:10.1039/d1ra04892a), 2021-10-15
Supplement: RA-011-D1RA04892A-s001.pdf [file RA-011-D1RA04892A-s001.pdf]

Supplementary data for “Preparation of magnetically recyclable superparamagnetic silica support  
Pd catalyst through boronic acid linker and it applications in Suzuki reactions”

1. The HPLC chromatograms

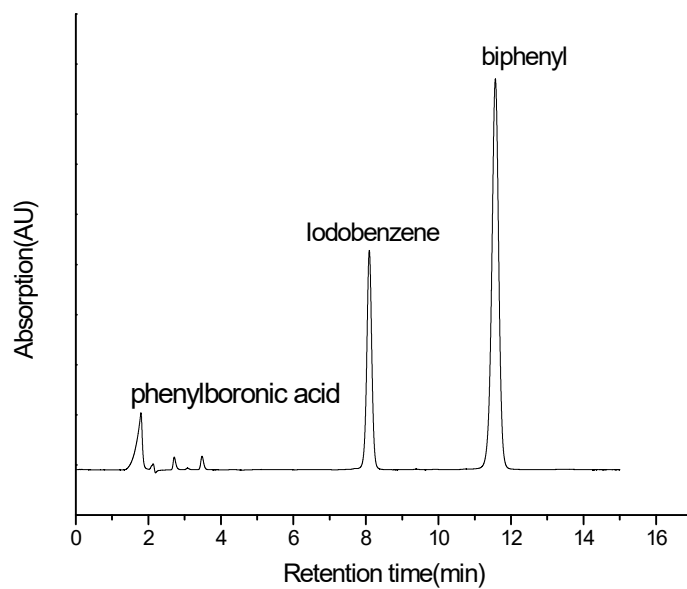

Figure S1 The typical HPLC chromatogram of biphenyl obtained from Suzuki reaction of iodobenzen

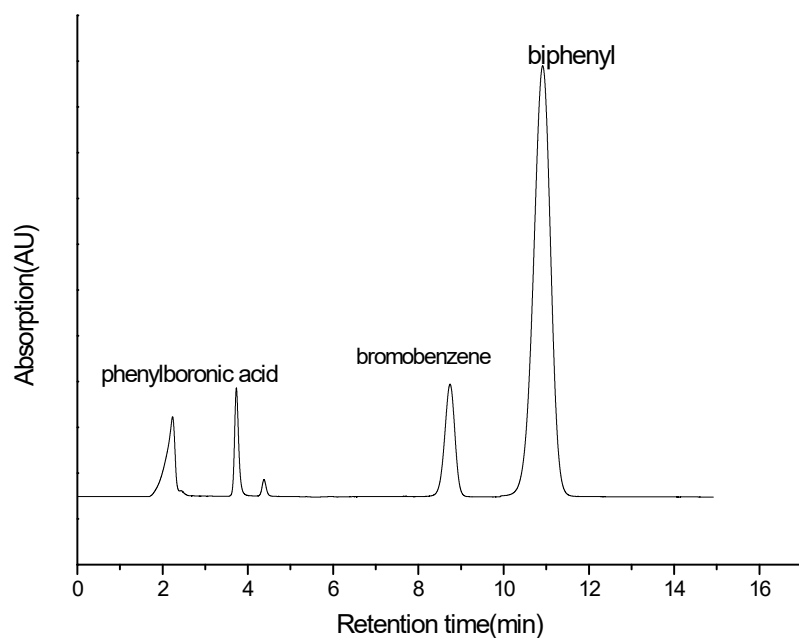

Figure S2 The typical HPLC chromatogram of biphenyl obtained from Suzuki reaction of bromobenzene

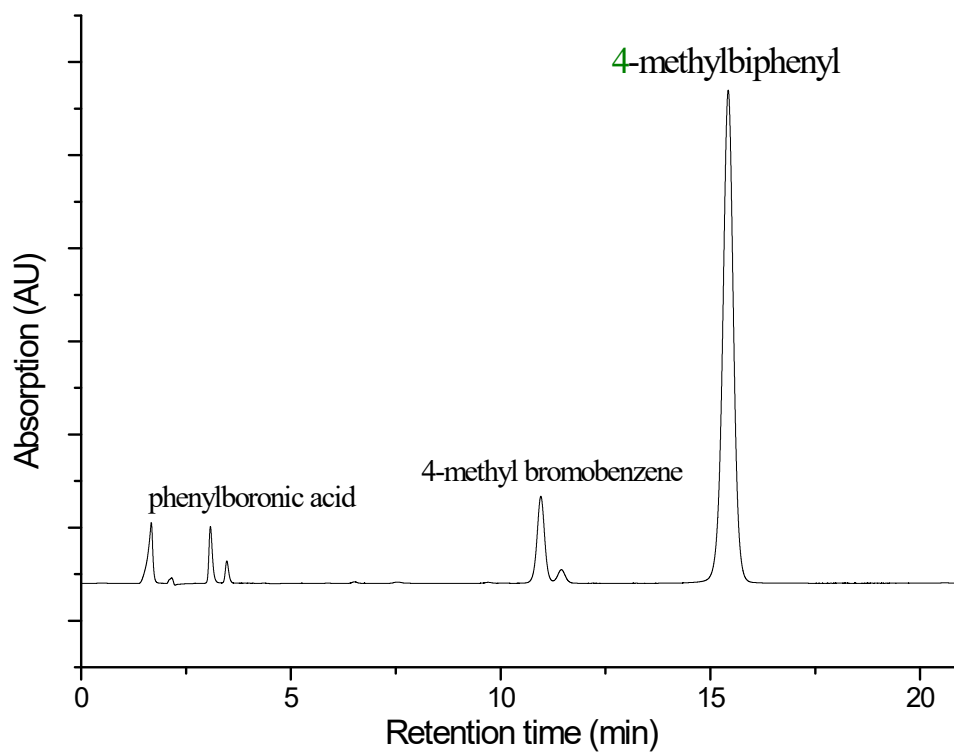

Figure S3 The typical HPLC chromatogram of 4-methylbiphenyl obtained from Suzuki reaction

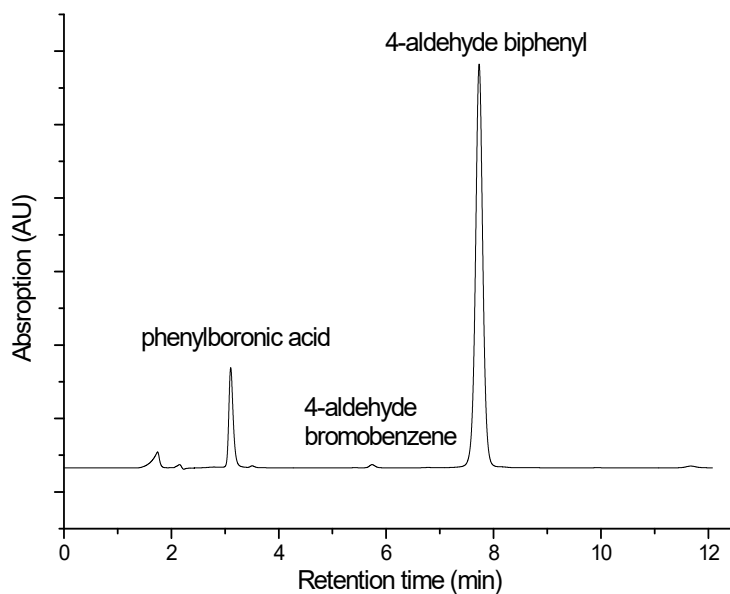

Figure S4 The typical HPLC chromatogram of 4-aldehyde biphenyl obtained from Suzuki reaction

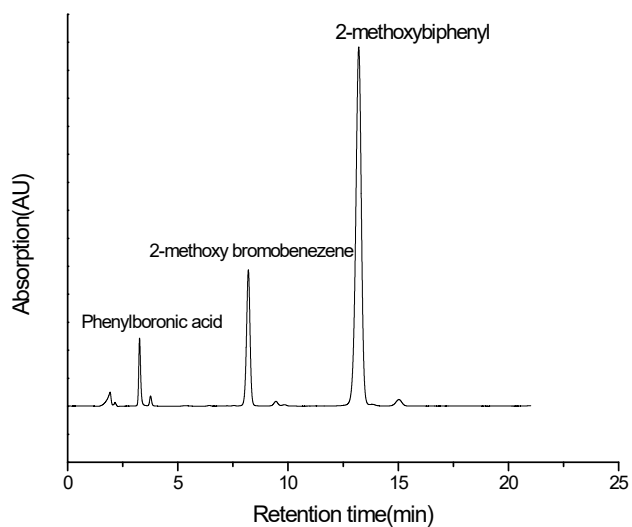

Figure S5 The typical HPLC chromatogram of 2-methoxy biphenyl obtained from Suzuki reaction

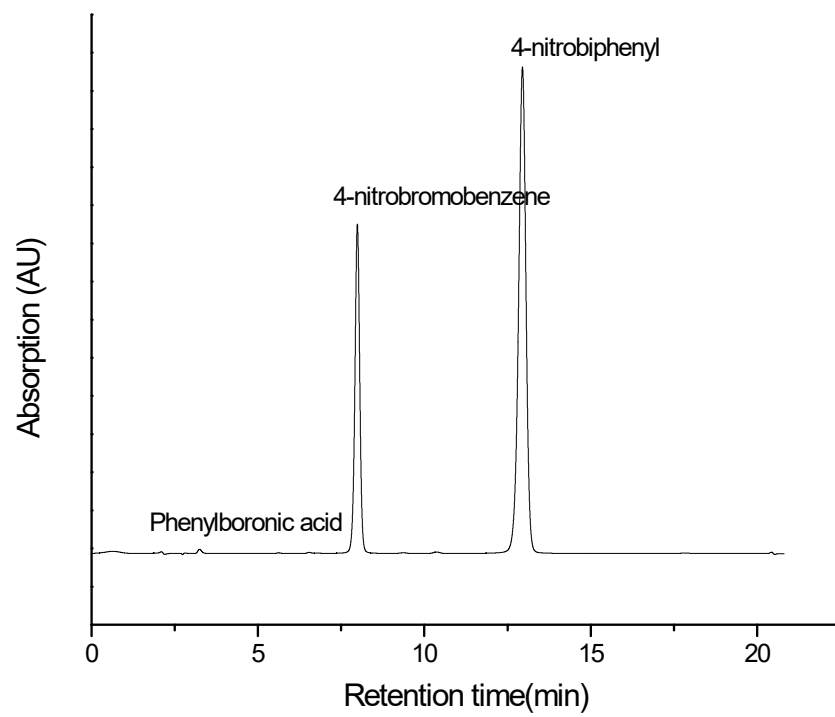

Figure S6 The typical HPLC chromatogram of 4-nitrile biphenyl obtained from Suzuki reaction

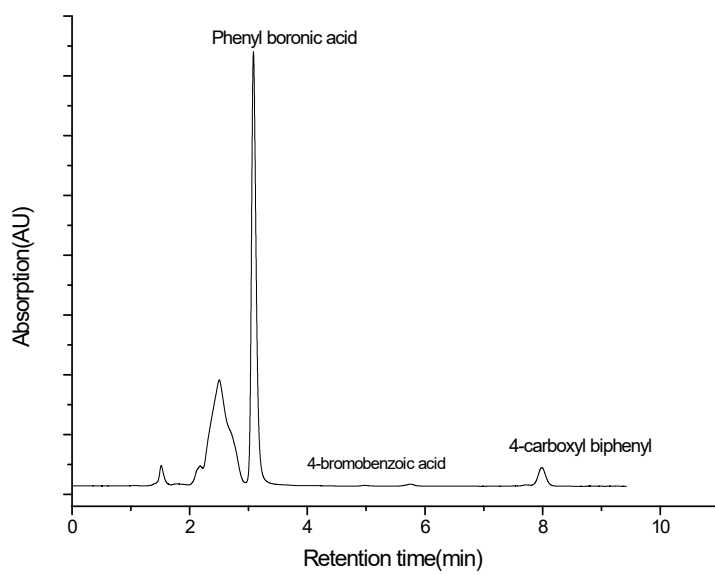

Figure S7 The typical HPLC chromatogram of 4-carboxyl biphenyl obtained from Suzuki reaction

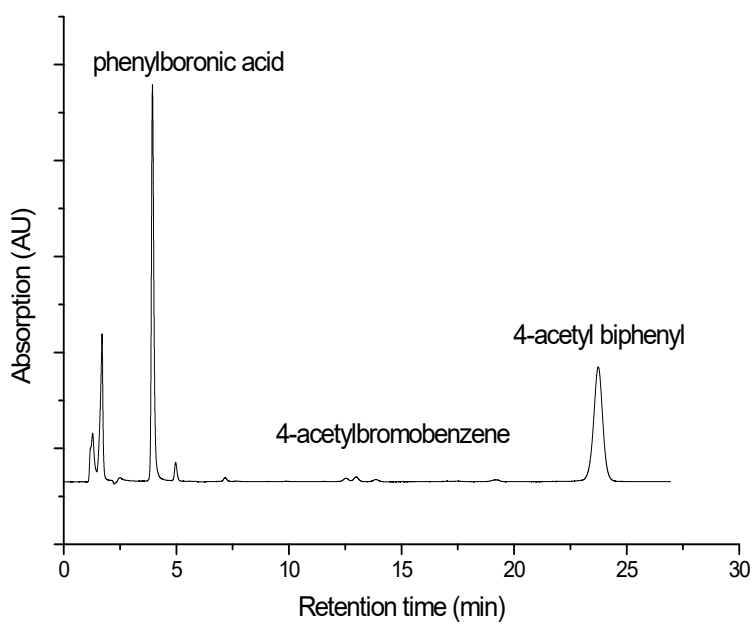

Figure S8 The typical HPLC chromatogram of 4-acetyl biphenyl obtained from Suzuki reaction

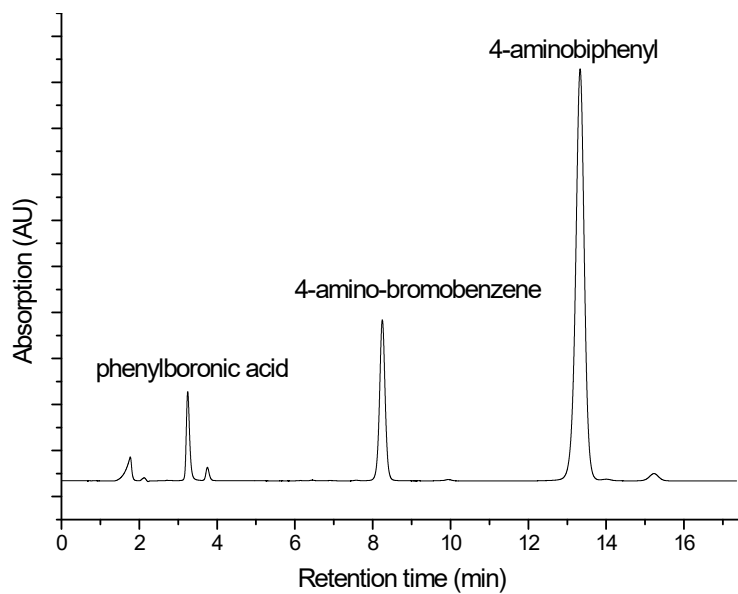

Figure S9 The typical HPLC chromatogram of 4-aminobiphenyl obtained from Suzuki reaction

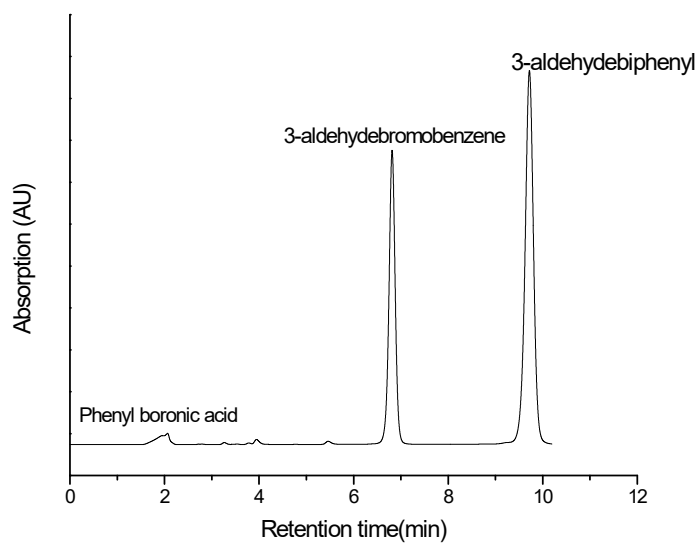

Figure S10 The typical HPLC chromatogram of 3-aldehyde biphenyl obtained from Suzuki reaction

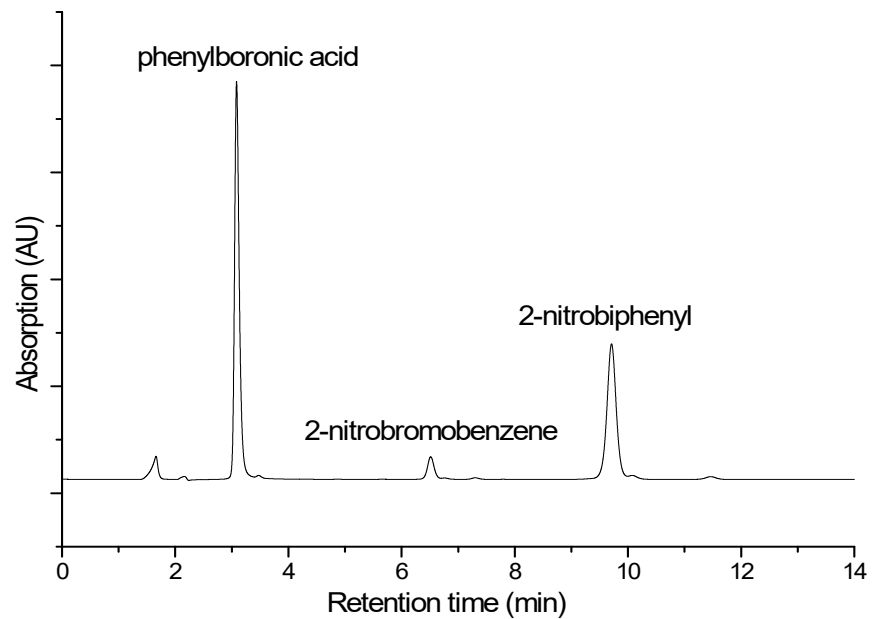

Figure S11 The typical HPLC chromatogram of 2-nitrobiphenyl obtained from Suzuki reaction

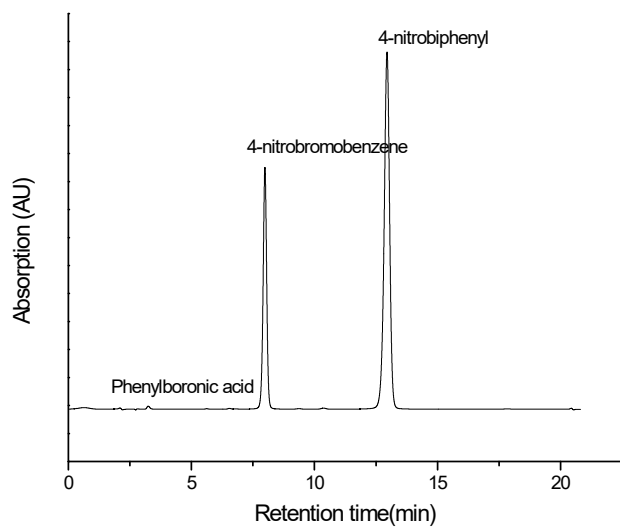

Figure S12 The typical HPLC chromatogram of 4-nitrobiphenyl obtained from Suzuki reaction

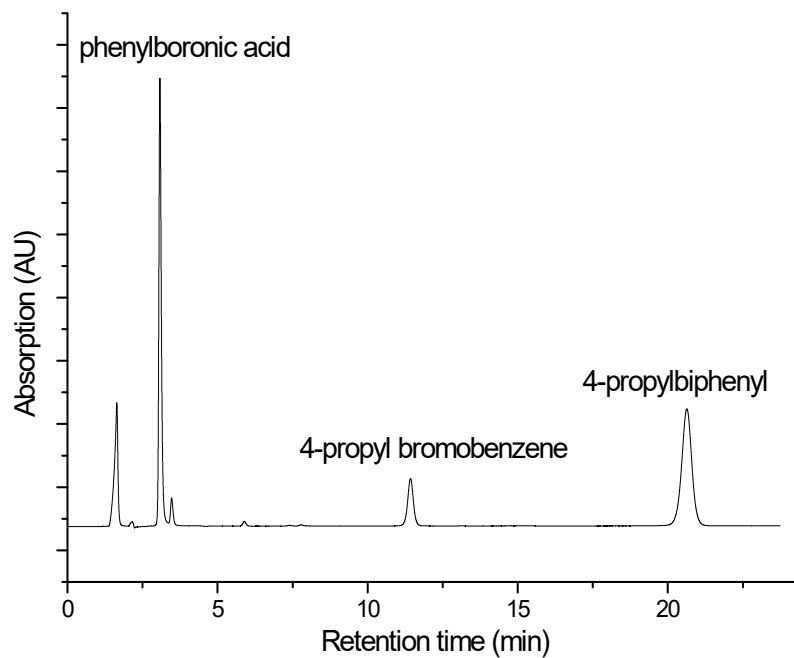

Figure S13 The typical HPLC chromatogram of 4-propylbiphenyl obtained from Suzuki reaction

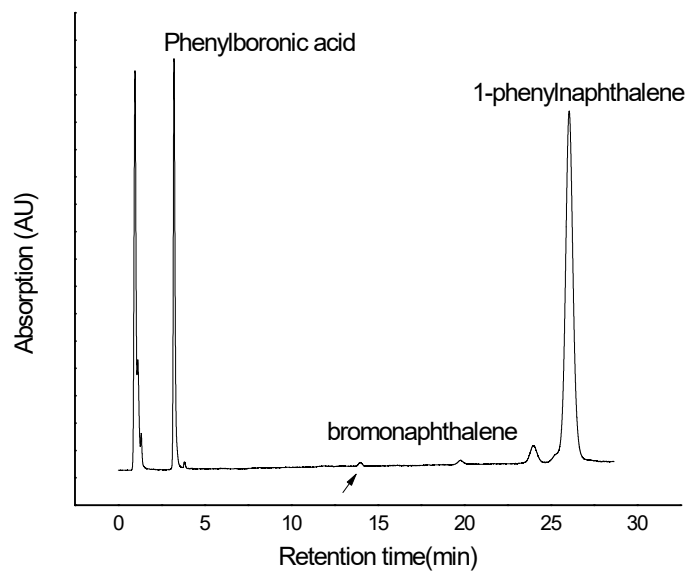

Figure S14 The typical HPLC chromatogram of 1-phenylnaphthalene obtained from Suzuki reaction



## 2. $^1\text{H}$ NMR spectra of 14 Suzuki reaction products

Firstly, all of Suzuki reaction products were purified by C18 SPE column and examined by HPLC. Then, the purified products were characterized by NMR one by one. Their  $^1\text{H}$  NMR spectra were as follows:

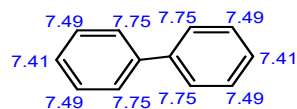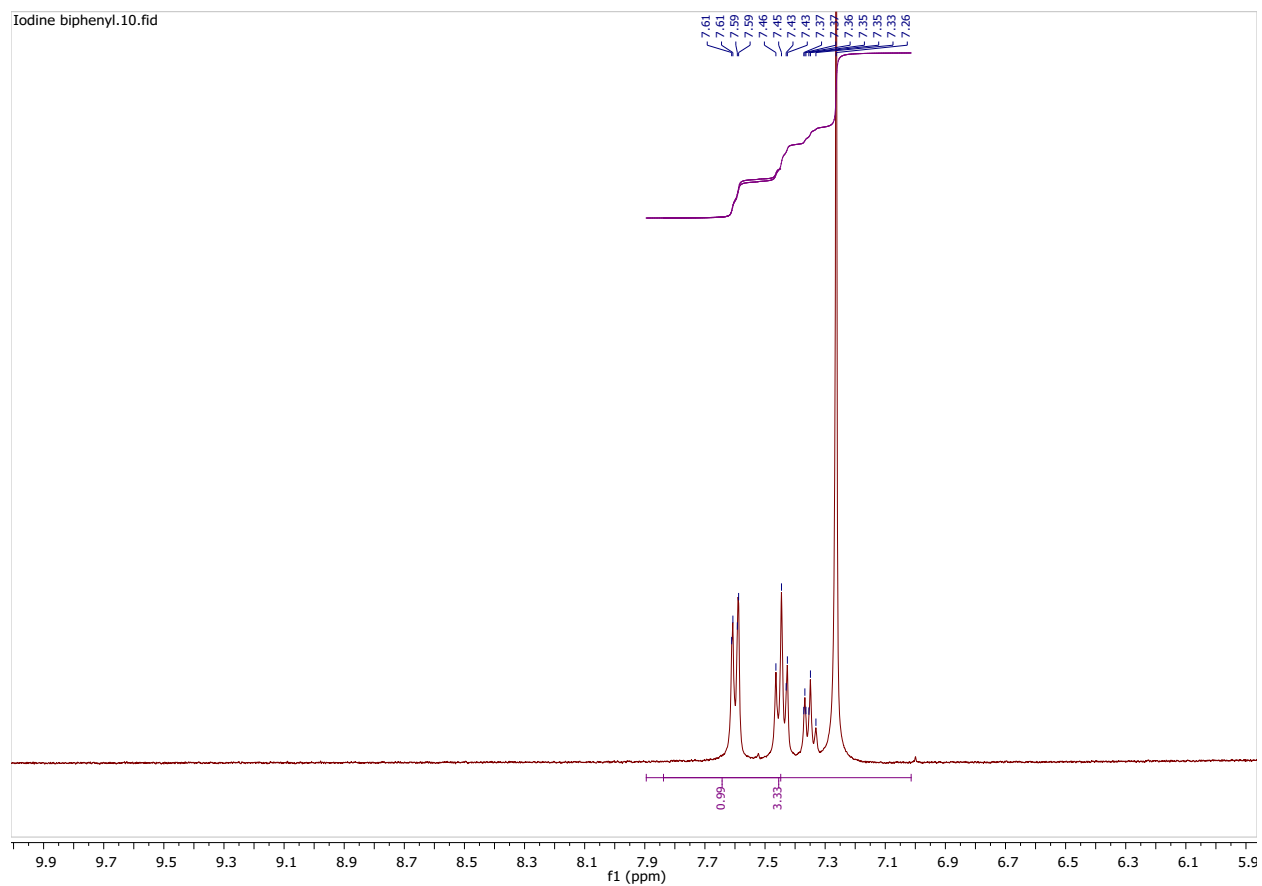

Figure S15  $^1\text{H}$  NMR spectrum of biphenyl obtained from Suzuki reaction of iodobenzene

$^1\text{H}$  NMR (400 MHz, Chloroform-*d*)  $\delta$  7.26 (s, 3H), 7.00 (s, 3H), 7.60 (dd,  $J = 7.6, 1.7$  Hz, 3H).

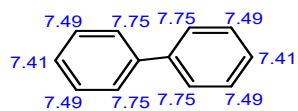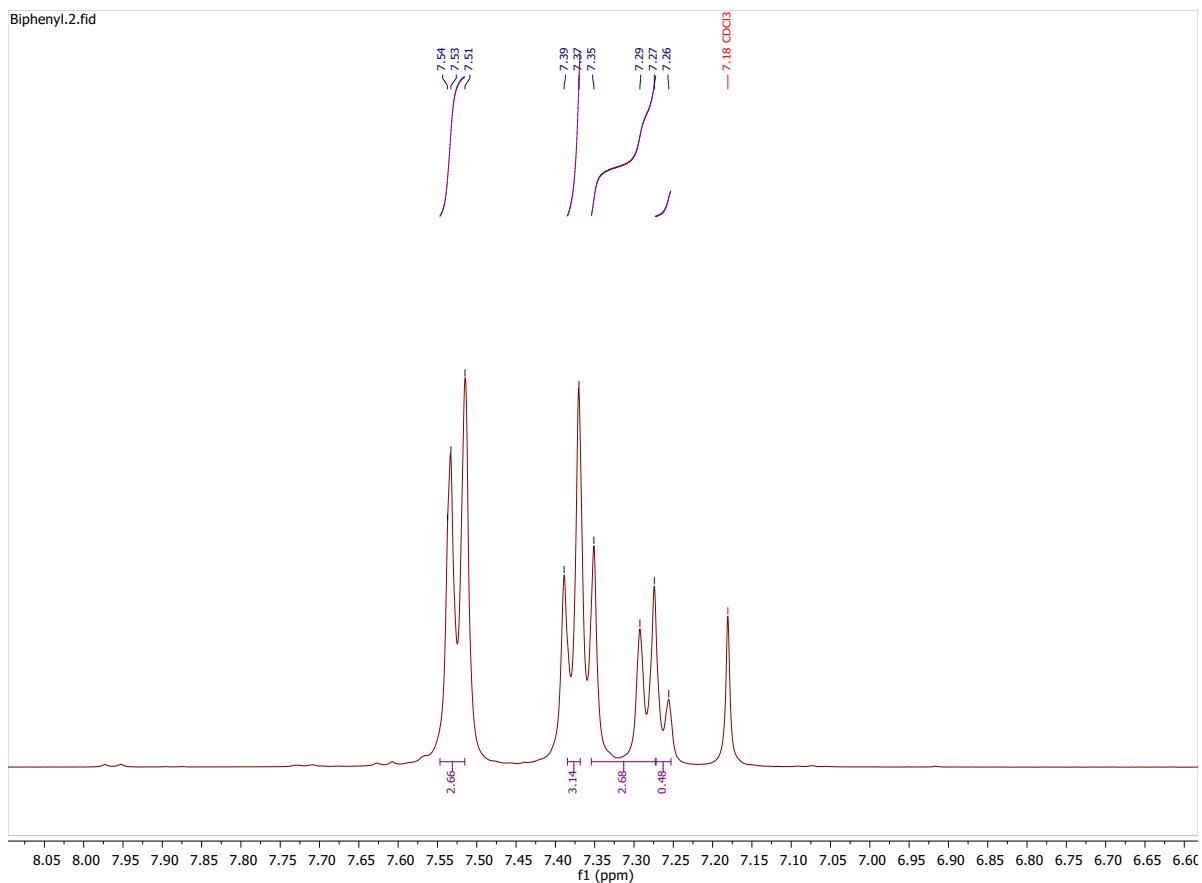

Figure S16 <sup>1</sup>H NMR spectrum of biphenyl obtained from Suzuki reaction of bromobenzene

<sup>1</sup>H NMR (400 MHz, Chloroform-*d*) δ 7.53 (d, *J* = 1.7 Hz, 3H), 7.37 (s, 3H), 7.28 (d, *J* = 7.3 Hz, 3H), 7.26 (s, 0H), 5.10 (s, 0H), 4.82 (s, 0H), 4.75 (s, 1H), 1.18 (s, 1H).

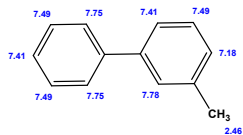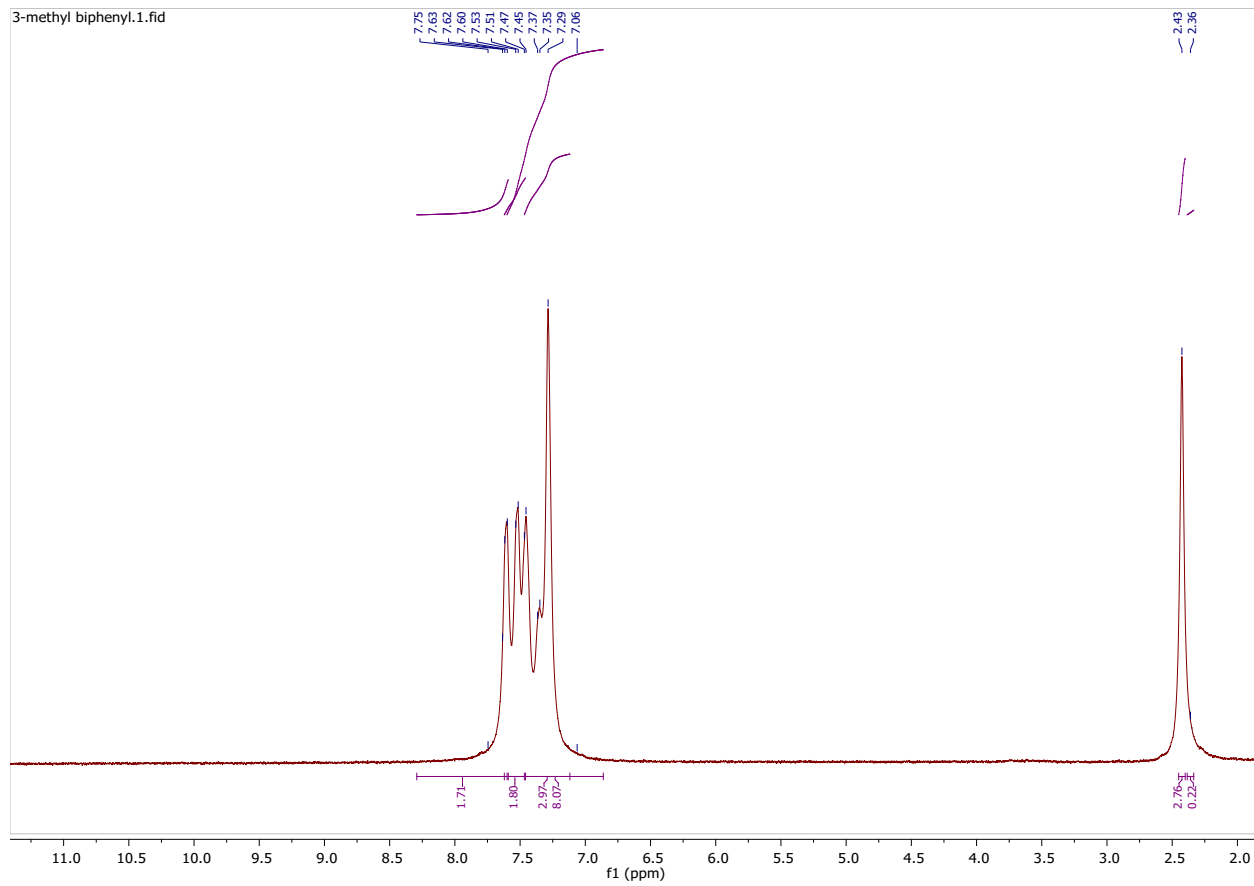

Figure S17  $^1\text{H}$  NMR spectrum of 3-methyl biphenyl

$^1\text{H}$  NMR (400 MHz, Chloroform-*d*)  $\delta$  7.62 (s, 2H), 7.53 (d,  $J = 52.4$  Hz, 2H), 7.62 – 7.46 (m, 2H), 7.40 (d,  $J = 42.5$  Hz, 2H), 2.43 (s, 3H), 1.28 (s, 1H)

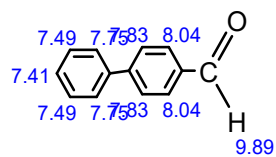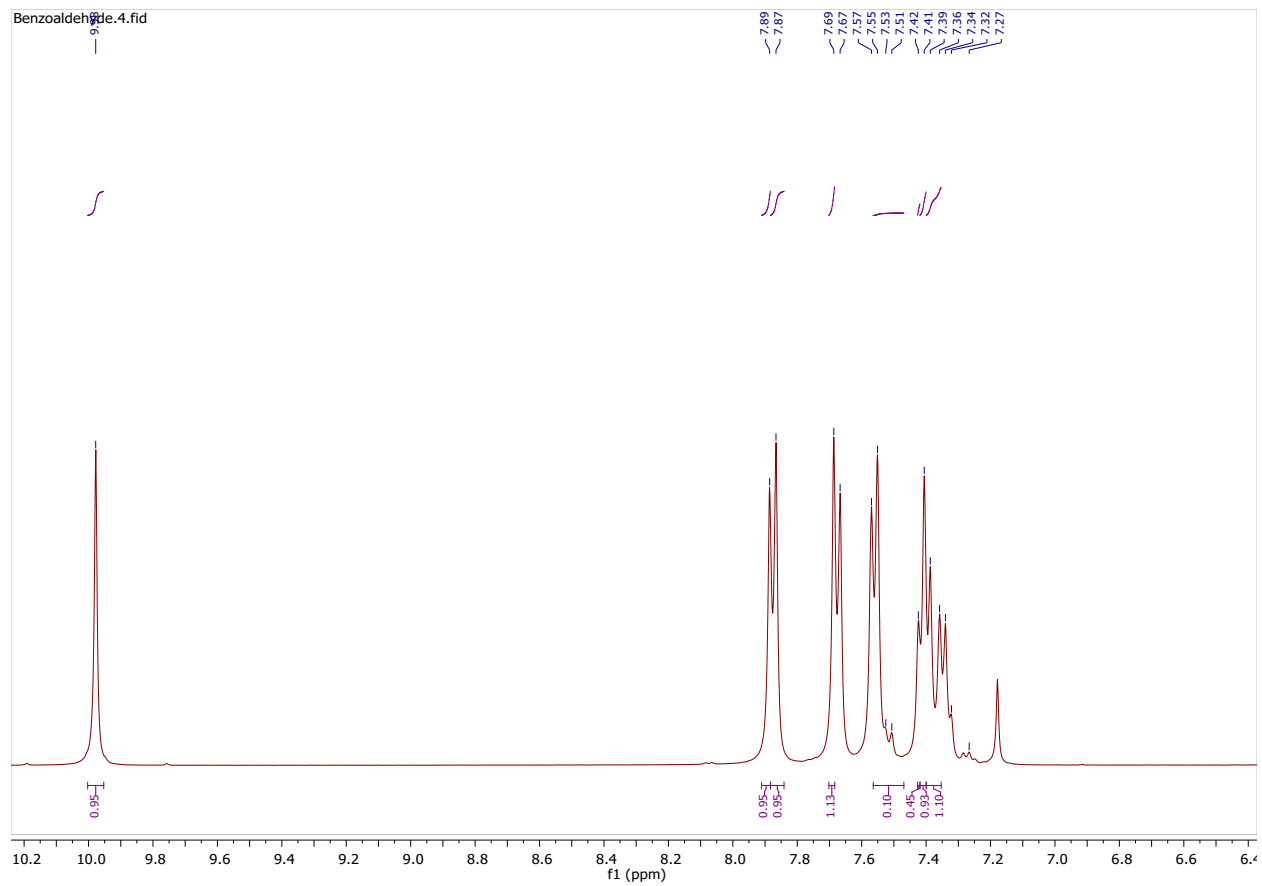

Figure S18  $^1\text{H}$  NMR spectrum of 4-aldehyde biphenyl

$^1\text{H}$  NMR (400 MHz, Chloroform-*d*)  $\delta$  7.89 (s, 1H), 7.87 (s, 1H), 7.69 (s, 1H), 7.42 (s, 0H), 7.41 (s, 1H), 7.37 (d,  $J = 11.5$  Hz, 1H), 9.98 (s, 1H), 7.51 (s, 0H), 4.97 (s, 1H), 4.74 (q,  $J = 6.1$  Hz, 2H), 4.60 (s, 1H).

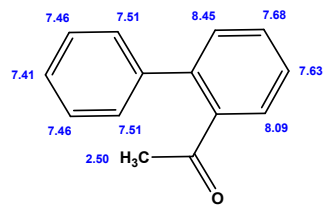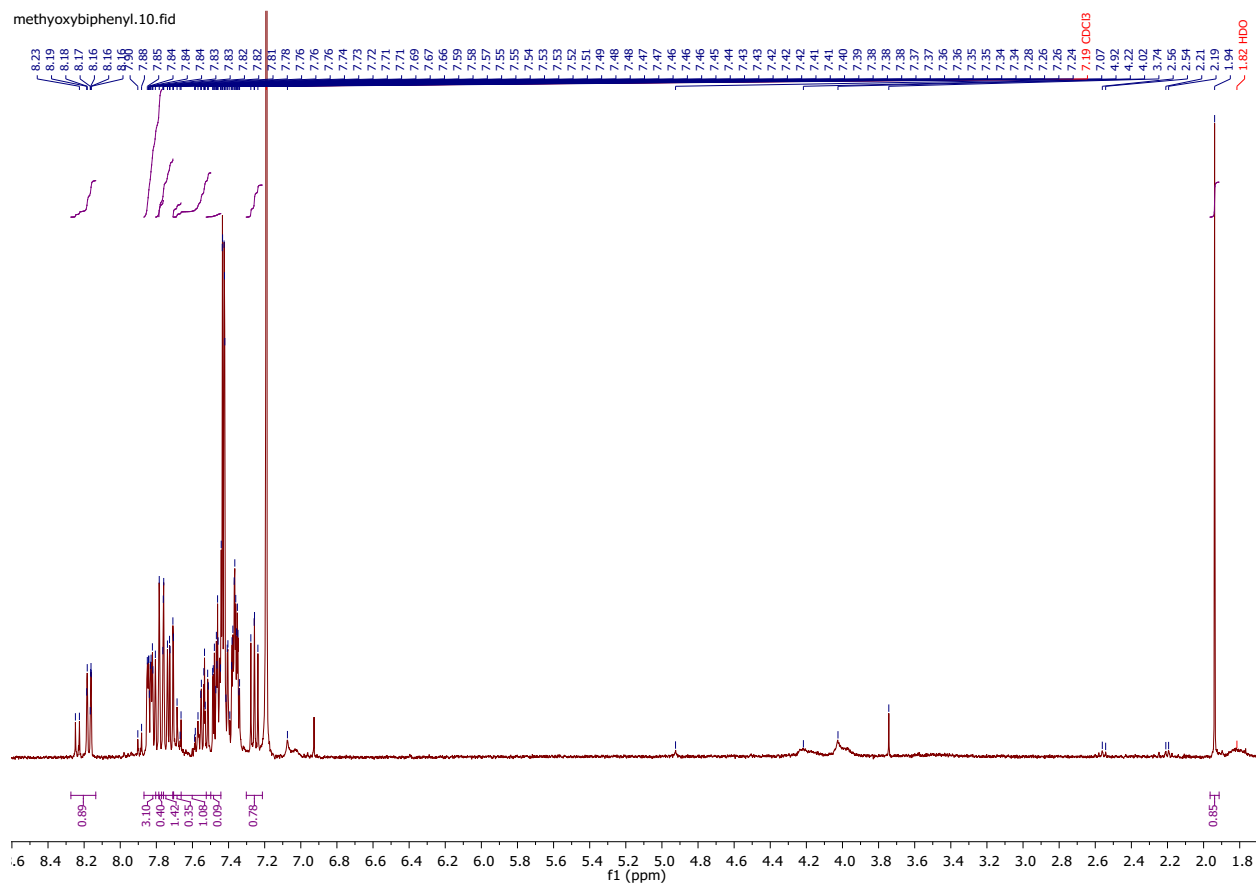

Figure S19  $^1\text{H}$  NMR spectrum of 2-methoxybiphenyl

$^1\text{H}$  NMR (400 MHz, Chloroform-*d*)  $\delta$  8.27 – 8.14 (m, 1H), 7.87 – 7.77 (m, 3H), 7.76 (d,  $J = 1.0$  Hz, 0H), 7.79 – 7.71 (m, 1H), 7.71 – 7.66 (m, 0H), 7.59 (d,  $J = 11.9$  Hz, 0H), 7.70 – 7.50 (m, 1H), 7.45 (s, 0H), 7.26 (dd,  $J = 8.2, 7.4$  Hz, 1H), 1.94 (s, 1H), 1.48 (s, 4H), 1.32 (s, 3H), 1.18 (s, 1H), 0.89 (s, 1H).

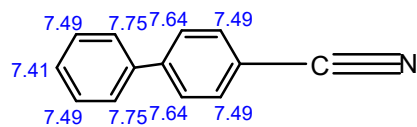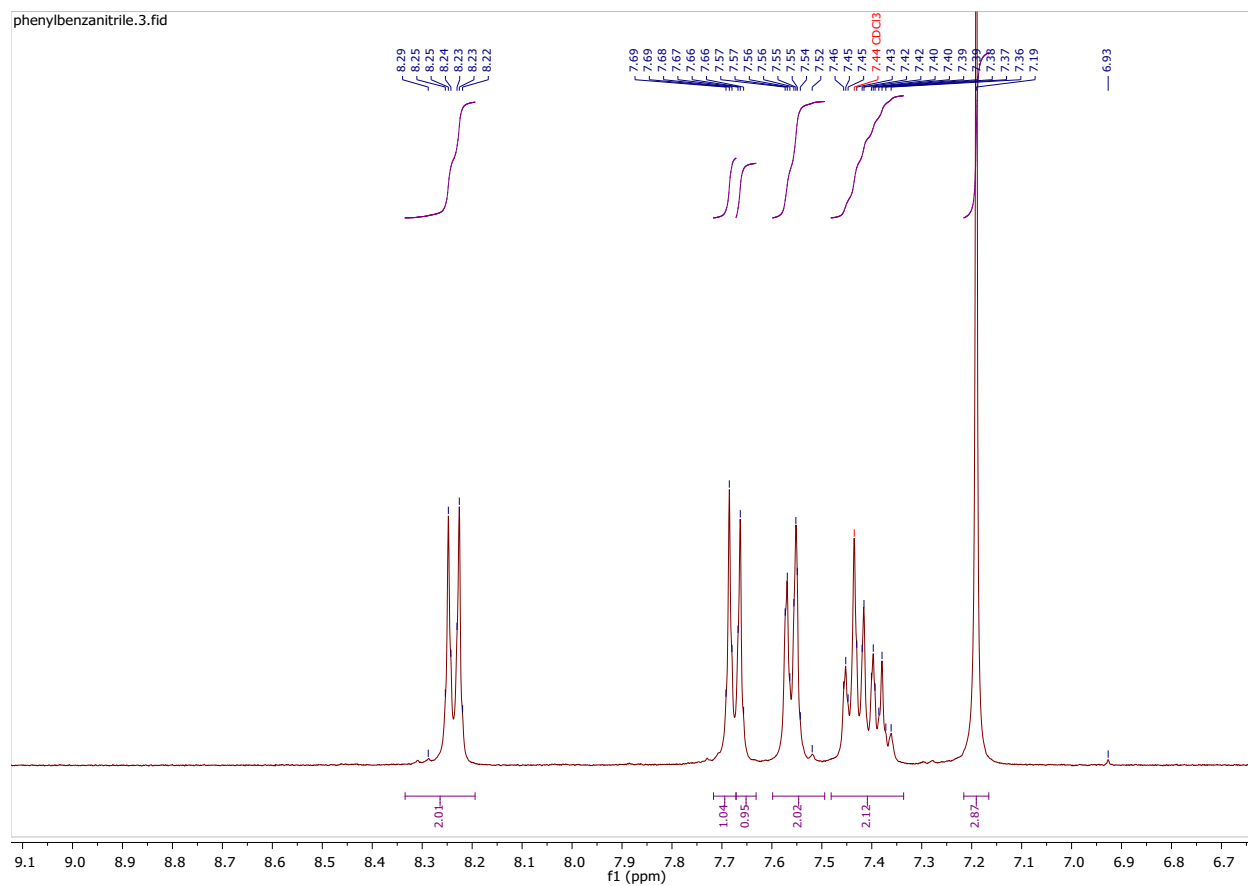

Figure S20  $^1\text{H}$  NMR spectrum of 4-nitrile biphenyl

$^1\text{H}$  NMR (400 MHz, Chloroform-*d*)  $\delta$  8.33 – 8.19 (m, 2H), 7.68 (d,  $J = 2.1$  Hz, 1H), 7.67 (d,  $J = 1.8$  Hz, 1H), 7.56 (dt,  $J = 6.0, 1.4$  Hz, 2H), 7.48 – 7.34 (m, 2H), 7.19 (s, 3H), 1.18 (s, 0H), 0.77 (s, 0H).

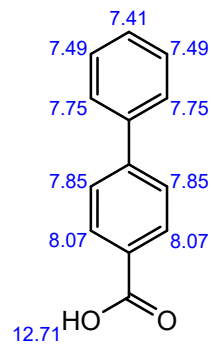

Biphenyl-4-carboxylic acid.13.fid

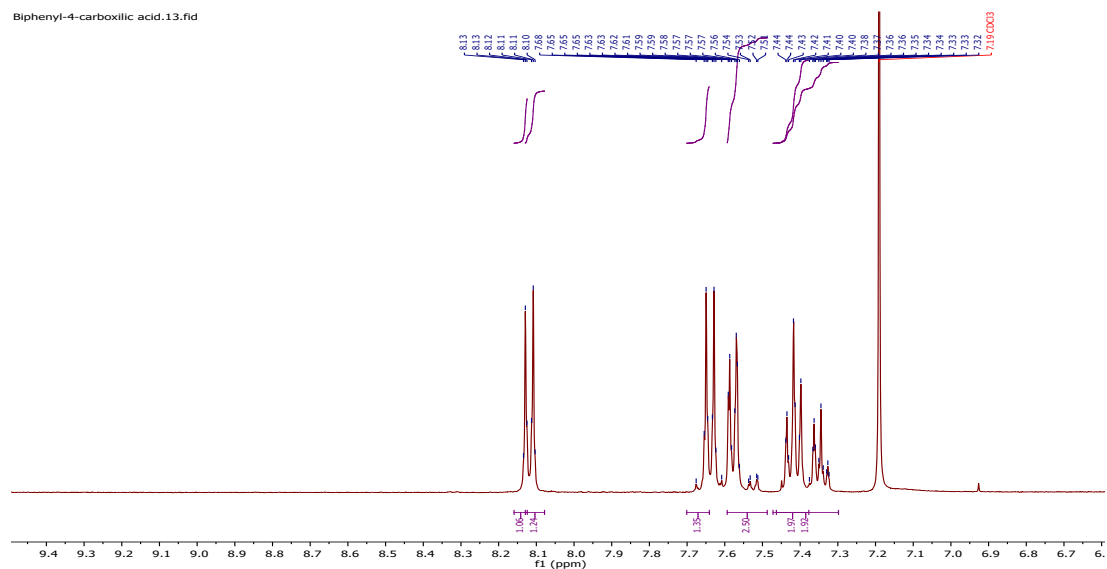

Figure S21 <sup>1</sup>H NMR spectrum of 4-carboxyl biphenyl

<sup>1</sup>H NMR (400 MHz, Chloroform-*d*) δ 8.13 (d,  $J = 1.8$  Hz, 1H), 8.11 (d,  $J = 1.8$  Hz, 1H), 7.65 (d,  $J = 1.7$  Hz, 1H), 7.59 – 7.49 (m, 3H), 7.46 – 7.38 (m, 2H), 7.47 – 7.30 (m, 2H), 4.14 (s, 1H), 2.02 (s, 0H), 1.94 (s, 0H), 1.18 (s, 0H), 0.99 (s, 0H).

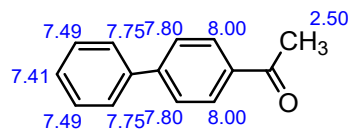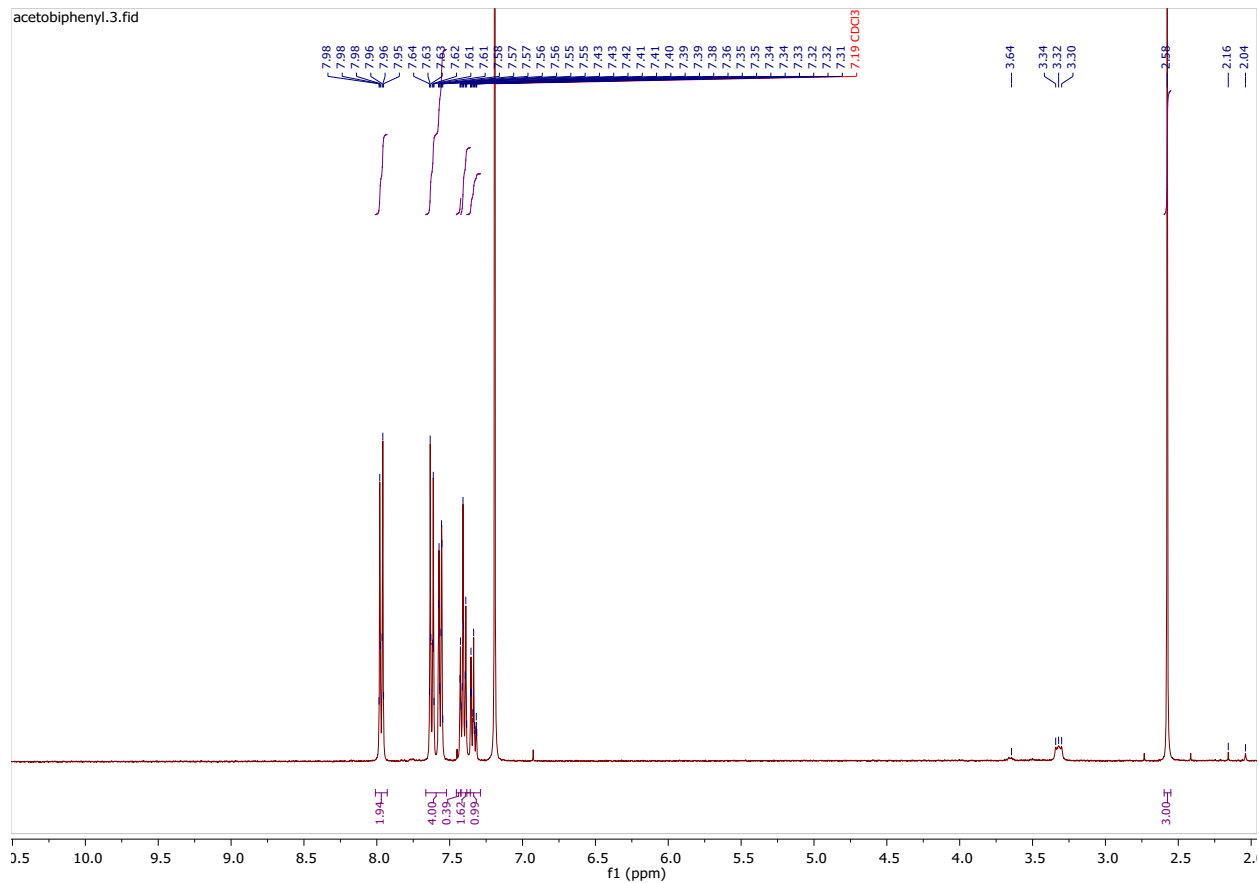

Figure S22  $^1\text{H}$  NMR spectrum of 4-acetybiphenyl

$^1\text{H}$  NMR (400 MHz, Chloroform-*d*)  $\delta$  8.01 – 7.93 (m, 2H), 7.66 – 7.52 (m, 4H), 7.43 (d,  $J = 1.2$  Hz, 0H), 7.42 – 7.36 (m, 2H), 7.38 – 7.29 (m, 1H), 2.58 (s, 3H), 1.51 – 1.34 (m, 2H), 0.95 (t,  $J = 7.2$  Hz, 1H).



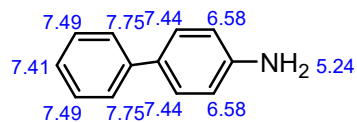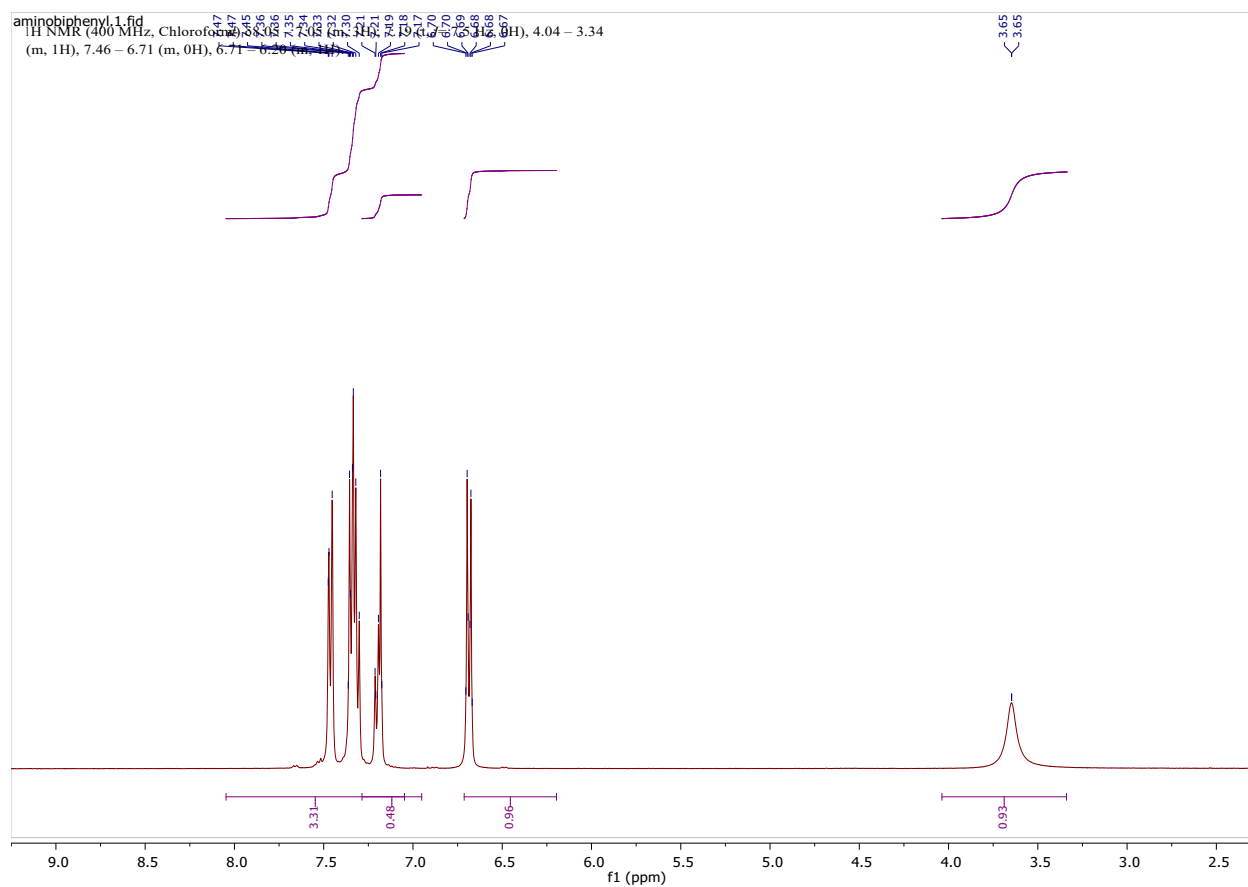

Figure S23 <sup>1</sup>H NMR spectrum of 4-aminobiphenyl

<sup>1</sup>H NMR (400 MHz, Chloroform-*d*) δ 8.05 – 7.05 (m, 3H), 7.19 (t, *J* = 7.5 Hz, 3H), 4.04 – 3.34 (m, 1H), 7.46 – 6.71 (m, 3H), 6.71 – 6.20 (m, 1H).

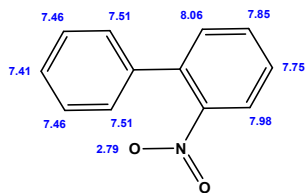

nitrobiphenyl.10.fid

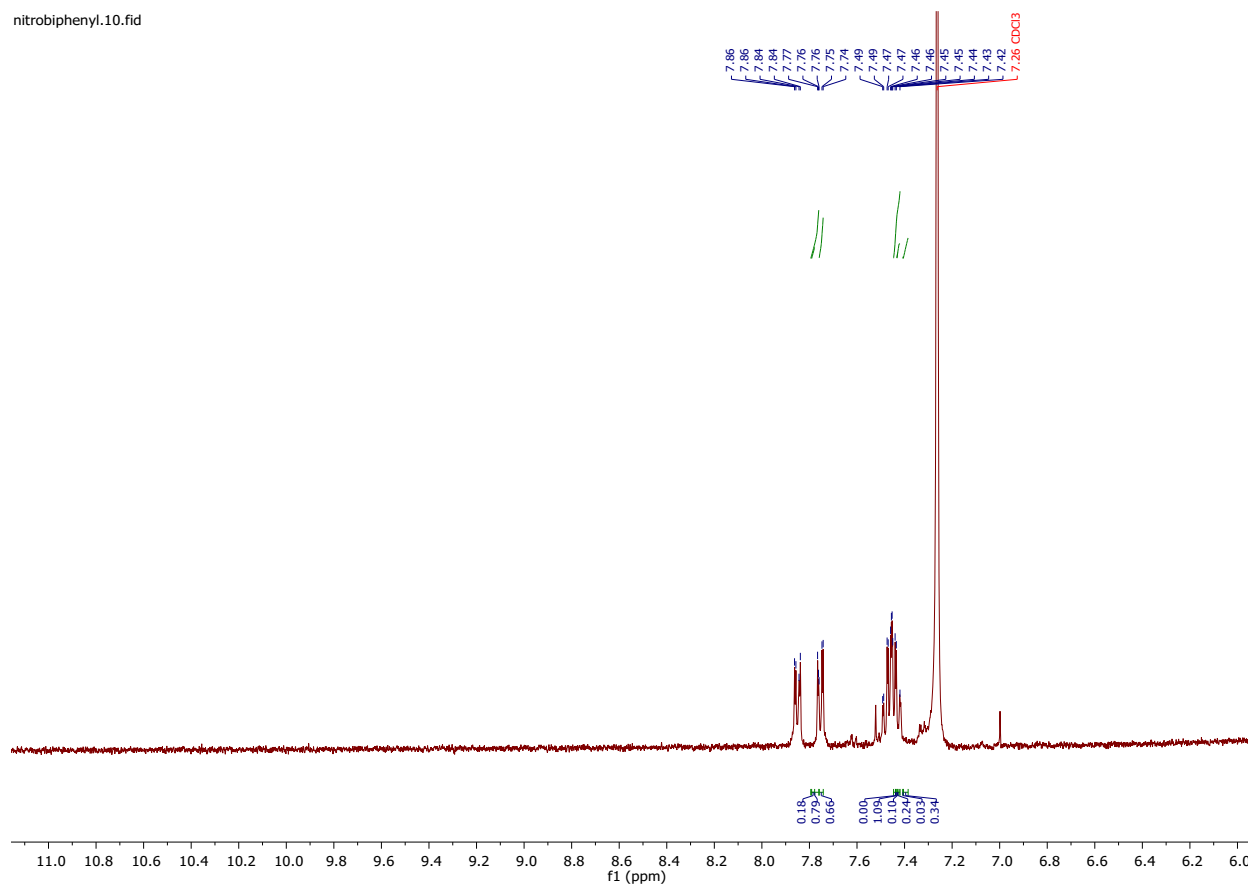

Figure S25  $^1\text{H}$  NMR spectrum of 2-nitro biphenyl

$^1\text{H}$  NMR (400 MHz, Chloroform-*d*)  $\delta$  7.76 (d,  $J = 1.6$  Hz, 1H), 7.74 (d,  $J = 2.0$  Hz, 1H), 7.45 – 7.42 (m, 1H), 4.67 (s, 2H), 2.01 (s, 3H), 1.25 (s, 2H), 0.88 (s, 1H), 0.07 (s, 1H).

ChemNMR <sup>1</sup>H Estimation

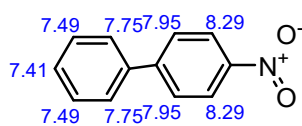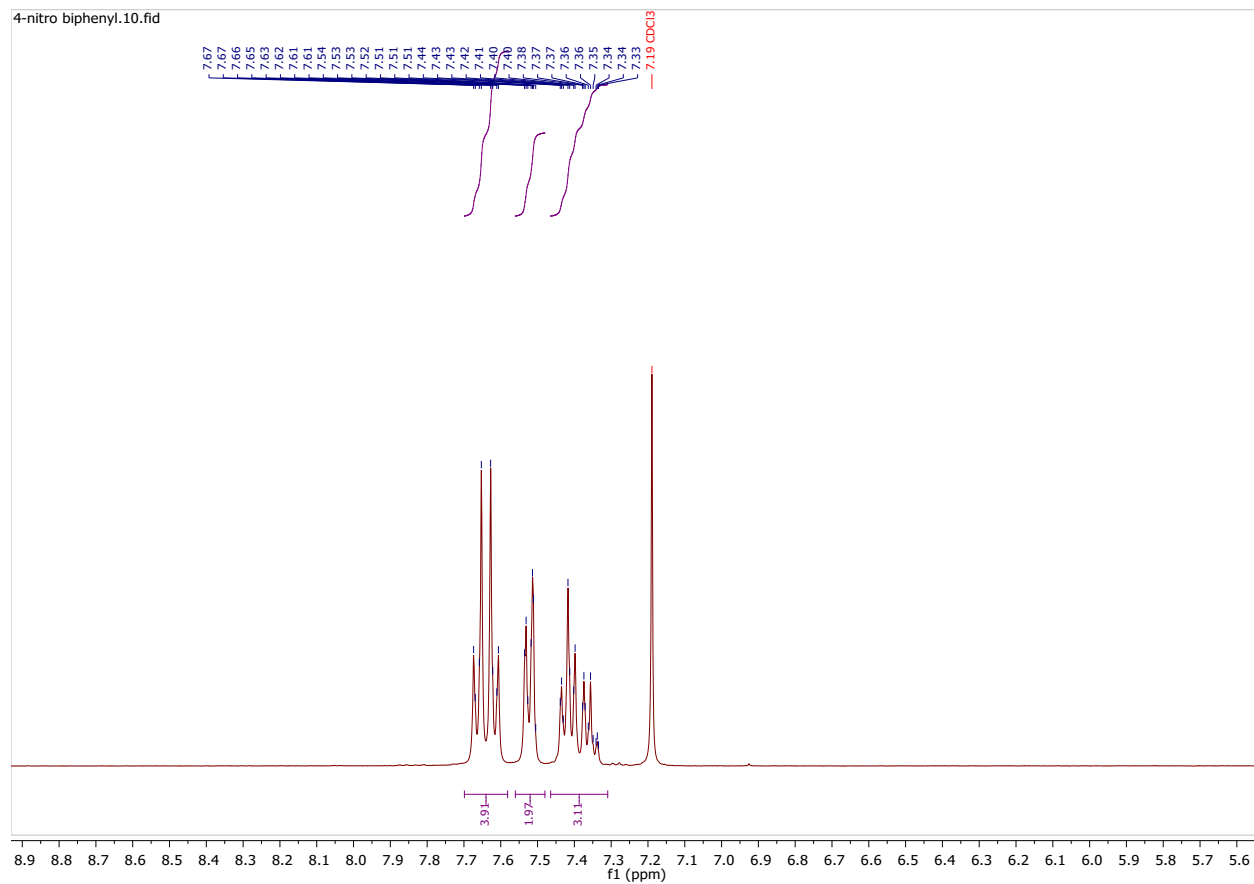

Figure S26 <sup>1</sup>H NMR spectrum of 4-nitro biphenyl

<sup>1</sup>H NMR (400 MHz, Chloroform-*d*)  $\delta$  7.64 (q,  $J = 8.5$  Hz, 4H), 7.52 (dt,  $J = 6.2, 1.4$  Hz, 2H), 7.46 – 7.31 (m, 3H), 1.18 (s, 0H).

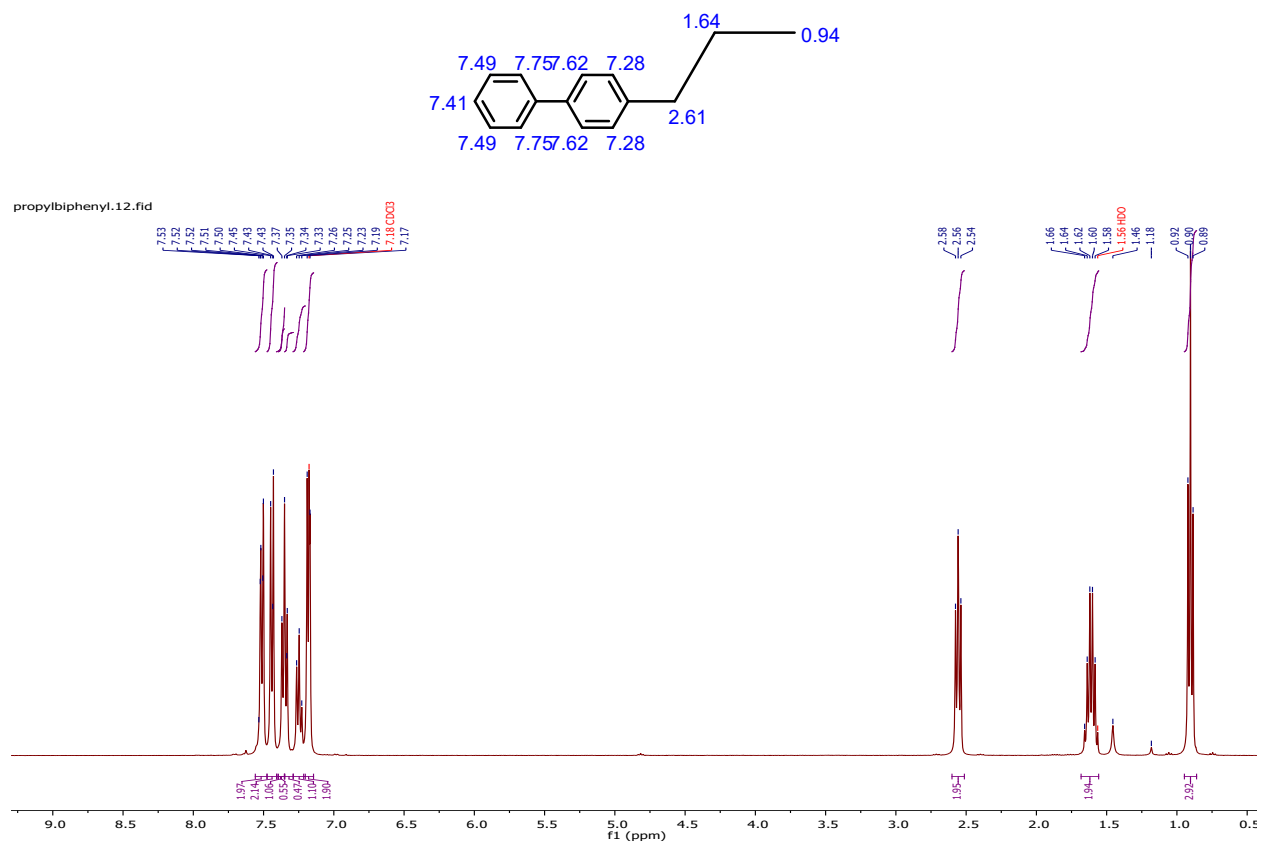

Figure S27  $^1\text{H}$  NMR spectrum of 4-propylbiphenyl

$^1\text{H}$  NMR (400 MHz, Chloroform-*d*)  $\delta$  7.51 (dd,  $J = 7.3, 1.7$  Hz, 2H), 7.44 (d,  $J = 8.0$  Hz, 2H), 7.37 (s, 1H), 7.35 (s, 1H), 7.33 (d,  $J = 1.6$  Hz, 0H), 7.25 (t,  $J = 7.3$  Hz, 1H), 7.18 (d,  $J = 8.1$  Hz, 2H), 2.56 (t,  $J = 7.7$  Hz, 2H), 1.62 (p,  $J = 7.5$  Hz, 2H), 0.90 (t,  $J = 7.3$  Hz, 3H).

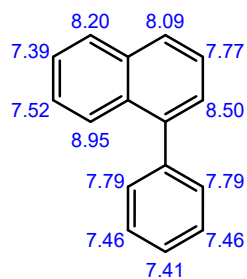

phenylnaphthalene.11.fid

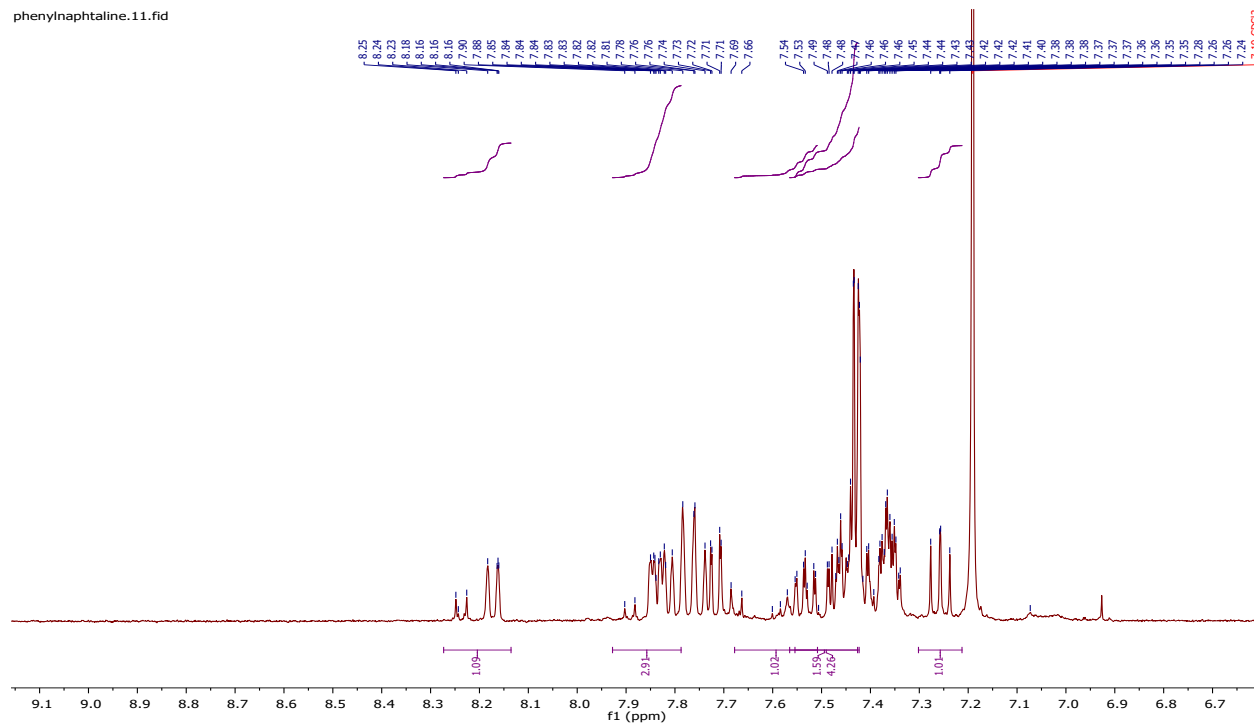

Figure S28  $^1\text{H}$  NMR spectrum of 4-phenylnaphthalene

$^1\text{H}$  NMR (400 MHz, Chloroform-*d*)  $\delta$  8.27 – 8.14 (m, 1H), 7.93 – 7.79 (m, 3H), 7.68 – 7.51 (m, 1H), 7.55 – 7.43 (m, 4H), 7.44 (d,  $J = 9.9$  Hz, 2H), 7.26 (dd,  $J = 8.2, 7.4$  Hz, 1H), 1.94 (s, 1H), 1.32 (s, 2H), 1.18 (s, 1H).

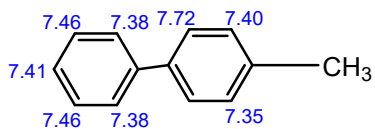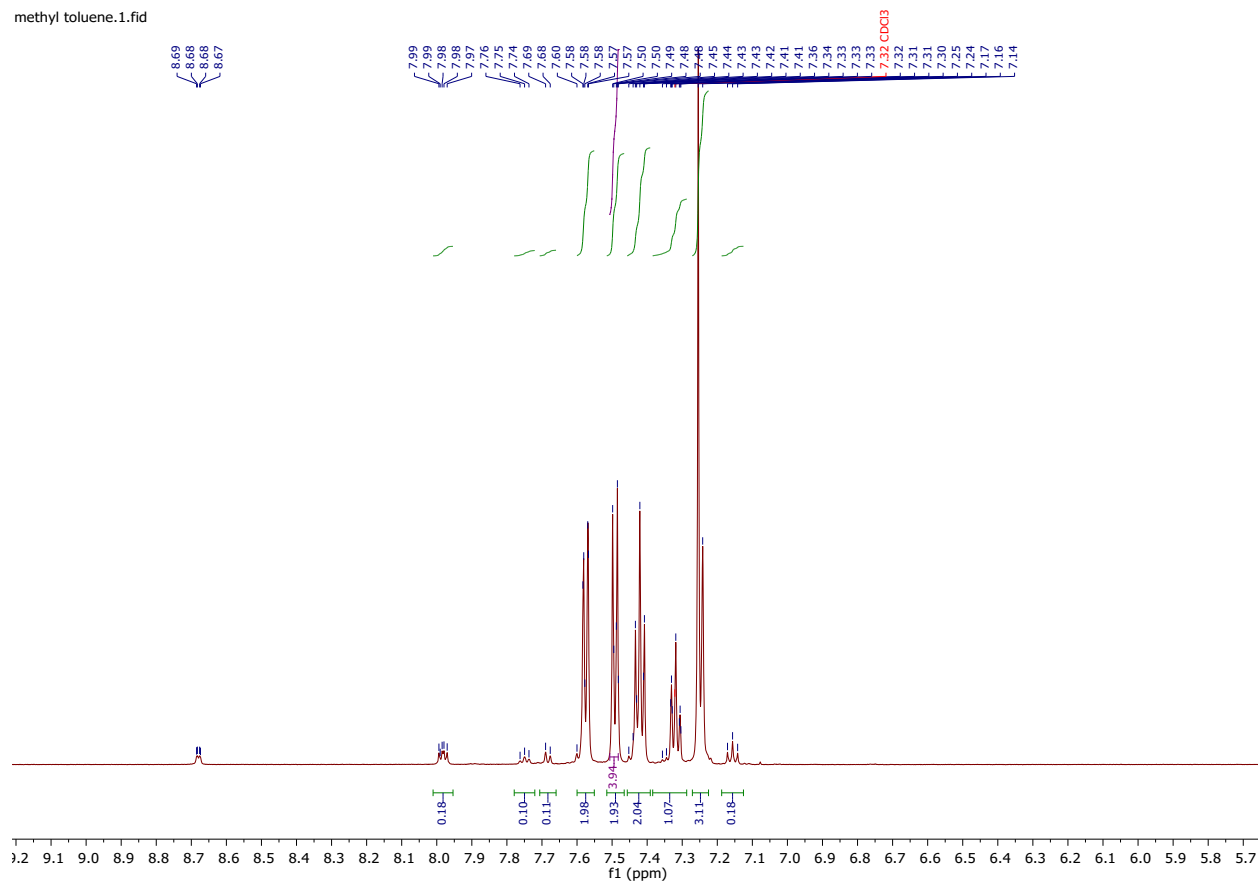

<sup>1</sup>H NMR spectrum of 4-methylbiphenyl (phenyl toluene)

<sup>1</sup>H NMR (600 MHz, Chloroform-*d*)  $\delta$  7.92 – 7.63 (m, 0H), 7.58 (t,  $J = 1.6$  Hz, 2H), 7.57 (d,  $J = 1.2$  Hz, 2H), 7.53 (s, 0H), 7.50 (d,  $J = 1.9$  Hz, 2H), 7.49 (d,  $J = 1.8$  Hz, 2H), 7.48 (s, 0H), 7.42 (t,  $J = 7.7$  Hz, 4H).
